# Supplementary material for: CASZ1 induces skeletal muscle and rhabdomyosarcoma differentiation through a feed-forward loop with MYOD and MYOG
Source: PubMed Central journal article supplement (PMC7021771; doi:10.1038/s41467-020-14684-4), 2020-02-14
Supplement: 41467_2020_14684_MOESM16_ESM.pdf [file 41467_2020_14684_MOESM16_ESM.pdf]

## Reporting Summary

Nature Research wishes to improve the reproducibility of the work that we publish. This form provides structure for consistency and transparency in reporting. For further information on Nature Research policies, see [Authors & Referees](#) and the [Editorial Policy Checklist](#).

### Statistics

For all statistical analyses, confirm that the following items are present in the figure legend, table legend, main text, or Methods section.

n/a Confirmed

- The exact sample size ( $n$ ) for each experimental group/condition, given as a discrete number and unit of measurement
- A statement on whether measurements were taken from distinct samples or whether the same sample was measured repeatedly
- The statistical test(s) used AND whether they are one- or two-sided  
*Only common tests should be described solely by name; describe more complex techniques in the Methods section.*
- A description of all covariates tested
- A description of any assumptions or corrections, such as tests of normality and adjustment for multiple comparisons
- A full description of the statistical parameters including central tendency (e.g. means) or other basic estimates (e.g. regression coefficient) AND variation (e.g. standard deviation) or associated estimates of uncertainty (e.g. confidence intervals)
- For null hypothesis testing, the test statistic (e.g.  $F$ ,  $t$ ,  $r$ ) with confidence intervals, effect sizes, degrees of freedom and  $P$  value noted  
*Give  $P$  values as exact values whenever suitable.*
- For Bayesian analysis, information on the choice of priors and Markov chain Monte Carlo settings
- For hierarchical and complex designs, identification of the appropriate level for tests and full reporting of outcomes
- Estimates of effect sizes (e.g. Cohen's  $d$ , Pearson's  $r$ ), indicating how they were calculated

*Our web collection on [statistics for biologists](#) contains articles on many of the points above.*

### Software and code

Policy information about [availability of computer code](#)

Data collection

Encode atac\_dnase\_pipelines was used for ATAC-seq data collection and analysis; trimmomatic 0.39 and Partek Flow was used for RNA-seq data collection and analysis. ChIP-seq data collection and analysis is shown in ChIP-seq reporting summary. The software and tools are installed on NIH Biowulf.

Data analysis

ComplexHeatmap package in R 3.4.3  
Partek Flow  
Parteck Genomics Suite v7.17  
DESeq2  
QIAGEN's Ingenuity® Pathway Analysis (IPA®, QIAGEN)  
GraphPad Prism 8.1.0  
Microsoft Excel 2019  
Microsoft Word 2019  
R version 3.5.2 with standard packages  
picard/2.18.27  
R/3.5  
R/3.5.2  
bwa/0.7.10  
samtools/1.2  
igvtools 2.4.16  
homer/4.10.1  
fastqc/0.11.8  
macs/2.1.2  
bedtools 2.27.1  
deeptools 3.1.3  
ROSE

bamliquidator/1.3.4  
 meme/5.0.1  
 ngsplo/2.63  
 python 2.7  
 ChIPpeakAnno 3.16.1; ComplexHeatmap 1.20.0; cluster 2.0.7; dendextend 1.10.0;  
 GenomicRanges 1.34.0; plyr 1.8.4  
 Adobe Illustrator CC 2017  
 Adobe Photoshop CC 2017  
 R2 database (2017)

For manuscripts utilizing custom algorithms or software that are central to the research but not yet described in published literature, software must be made available to editors/reviewers. We strongly encourage code deposition in a community repository (e.g. GitHub). See the Nature Research [guidelines for submitting code & software](#) for further information.

## Data

Policy information about [availability of data](#)

All manuscripts must include a [data availability statement](#). This statement should provide the following information, where applicable:

- Accession codes, unique identifiers, or web links for publicly available datasets
- A list of figures that have associated raw data
- A description of any restrictions on data availability

All the home generated RNA-seq, ChIP-seq and ATAC-seq datasets, the GEO accession number is GSE126147.

Link:

<https://www.ncbi.nlm.nih.gov/geo/query/acc.cgi?acc=GSE126147>.

Accession key:

abahoowhtcfix

Public available datasets:

| Data set                       | GEO number         | SRX number |
|--------------------------------|--------------------|------------|
| Yohe_SMS-CTR_D48_input_rep 2   | GSE85169, GSE85171 | SRX1998417 |
| Yohe_SMS-CTR_T48_input         | GSE85169, GSE85171 | SRX1998415 |
| Yohe_SMS-CTR_D48_H3K27ac       | GSE85169, GSE85171 | SRX1998404 |
| Yohe_SMS-CTR_T48_H3K27ac_rep 2 | GSE85169, GSE85171 | SRX1998406 |
| Yohe_SMS-CTR_D48_MYOD1_rep 2   | GSE85169, GSE85171 | SRX1998423 |
| Yohe_SMS-CTR_T48_MYOD1         | GSE85169, GSE85171 | SRX1998421 |
| Yohe_SMS-CTR_D48_MYOG          | GSE85169, GSE85171 | SRX1998424 |
| Yohe_SMS-CTR_T48_MYOG          | GSE85169, GSE85171 | SRX1998425 |
| Yohe_SMS-CTR_D48_PolII         | GSE85169, GSE85171 | SRX1998426 |
| Yohe_SMS-CTR-T48_PolII         | GSE85169, GSE85171 | SRX1998427 |
| Yohe_SMS-CTR_Dnase_D48_rep 2   | GSE85169, GSE85171 | SRX1998392 |
| Yohe_SMS-CTR_Dnase_T48_rep 2   | GSE85169, GSE85171 | SRX1998395 |
| Yohe_SMS-CTR_D48_RNA-seq       | GSE85170, GSE85171 | SRX1998431 |
| Yohe_SMS-CTR_T48_100nM_RNA-seq | GSE85170, GSE85171 | SRX1998437 |
| Bernstein_HSMM_Input           | GSE29611           | SRX067414  |
| Bernstein_HSMMtube_Input       | GSE29611           | SRX067399  |
| Bernstein_HSMM_H3K27ac         | GSE29611           | SRX067506  |
| Bernstein_HSMMtube_H3K27ac     | GSE29611           | SRX067417  |
| Blum_C2C12_Input_MB            | GSE76010           | SRX1557409 |
| Blum_C2C12_Input_MT_rep1       | GSE76010           | SRX1482290 |
| Blum_C2C12_H3K27ac_MB_Rep1     | GSE76010           | SRX1482271 |
| Blum_C2C12_H3K27ac_MT_Rep1     | GSE76010           | SRX1482273 |
| Soleimani_C2C12_MB_Myf5        | GSE24852           | SRX029143  |
| Marinov_C2C12_MyoD             | GSE44824           | SRX246932  |
| Marinov_C2C12_Myog             | GSE44824           | SRX246932  |

## Field-specific reporting

Please select the one below that is the best fit for your research. If you are not sure, read the appropriate sections before making your selection.

- Life sciences       Behavioural & social sciences       Ecological, evolutionary & environmental sciences

For a reference copy of the document with all sections, see [nature.com/documents/nr-reporting-summary-flat.pdf](https://www.nature.com/documents/nr-reporting-summary-flat.pdf)

## Life sciences study design

All studies must disclose on these points even when the disclosure is negative.

Sample size

Sample sizes were chosen based on expected phenotypes and previous experience with assay variability, as well as the minimum number of animals that required to do power calculation.

|                 |                                                                                                                                                                                                                                                                                                                                                                                                                                                                                                                                                                                                                                                                                                                                                                                                                                                                                                      |
|-----------------|------------------------------------------------------------------------------------------------------------------------------------------------------------------------------------------------------------------------------------------------------------------------------------------------------------------------------------------------------------------------------------------------------------------------------------------------------------------------------------------------------------------------------------------------------------------------------------------------------------------------------------------------------------------------------------------------------------------------------------------------------------------------------------------------------------------------------------------------------------------------------------------------------|
| Data exclusions | No data were excluded from these assays.                                                                                                                                                                                                                                                                                                                                                                                                                                                                                                                                                                                                                                                                                                                                                                                                                                                             |
| Replication     | Each experiment was done in replicated. The numbers were indicated in figure legend. For example, for cell proliferation assay, cell differentiation assay were repeated three or more times. RNA-seq experiments were performed in three biological replicates. Moreover, majority of the experiments were also confirmed through using different techniques and using multiple cell lines, such as the regulation of ERMS cell proliferation by CASZ1 was confirmed in two ERMS cell lines; transcriptome regulated by CASZ1 was analyzed in three cell lines; differentially expressed genes identified from RNA-seq was confirmed by realtime PCR; gene expression regulation was validated by both realtime PCR and western blot in different cell lines; the regulation of CASZ1 by RAS-MEK pathway was confirmed by both genetic inhibition and pharmaceutical inhibition of RAS-MEK pathway. |
| Randomization   | N=20 of 4 to 6 weeks old SCID female Beige mice for each cell line were randomly divided in 2 groups: one group of mice received normal chow diet while the other group received Dox-containing chow diet for over 5 days. All mice were injected with $2 \times 10^6$ cell suspension into the left hind limb at the gastrocnemius muscle of the mice. Each group of the mice continue to receive the same diet as before the cell injection.                                                                                                                                                                                                                                                                                                                                                                                                                                                       |
| Blinding        | Blinding was not performed since it was not necessary for this study.                                                                                                                                                                                                                                                                                                                                                                                                                                                                                                                                                                                                                                                                                                                                                                                                                                |

## Reporting for specific materials, systems and methods

We require information from authors about some types of materials, experimental systems and methods used in many studies. Here, indicate whether each material, system or method listed is relevant to your study. If you are not sure if a list item applies to your research, read the appropriate section before selecting a response.

### Materials & experimental systems

| n/a                                 | Involvement in the study                                        |
|-------------------------------------|-----------------------------------------------------------------|
| <input type="checkbox"/>            | <input checked="" type="checkbox"/> Antibodies                  |
| <input type="checkbox"/>            | <input checked="" type="checkbox"/> Eukaryotic cell lines       |
| <input checked="" type="checkbox"/> | <input type="checkbox"/> Palaeontology                          |
| <input type="checkbox"/>            | <input checked="" type="checkbox"/> Animals and other organisms |
| <input checked="" type="checkbox"/> | <input type="checkbox"/> Human research participants            |
| <input checked="" type="checkbox"/> | <input type="checkbox"/> Clinical data                          |

### Methods

| n/a                                 | Involvement in the study                        |
|-------------------------------------|-------------------------------------------------|
| <input type="checkbox"/>            | <input checked="" type="checkbox"/> ChIP-seq    |
| <input checked="" type="checkbox"/> | <input type="checkbox"/> Flow cytometry         |
| <input checked="" type="checkbox"/> | <input type="checkbox"/> MRI-based neuroimaging |

## Antibodies

### Antibodies used

Primary antibodies used for immunoblotting (WB) or immunofluorescence staining (IF):  
 CASZ1, home made by collaborating with Rockland Inc, affinity purified, named as Cas-ab8540, validated by siRNA, dilution 1:5000 for WB;  
 FLAG, Sigma-Aldrich, catalog number F1804, lot number SLBJ4607V, dilution 1:1000 for WB, 1:50 for IF;  
 Ty1, Diagenode, catalog number C15200054, lot number 006, dilution 1:4000 for WB;  
 MHC, EMD Millipore, catalog number 05-716, lot number DAM1408805, dilution 1:1000 for WB, 1:50 for IF;  
 MYOD, EMD Millipore, catalog number MAB3878, lot number LV1370583, dilution 1:1000 for WB;  
 MYOG, EMD Millipore, catalog number MAB3876, lot number LV1388792, dilution 1:1000 for WB;  
 $\alpha$ -Tubulin, CST, catalog number 3873s, 1:4000 for WB;  
 Total ERK1/2, CST, catalog number 9102, lot number 20, dilution 1:1000 for WB;  
 phospho-ERK1/2 (T202/Y204), CST, catalog number 9106, lot number 38, dilution 1:1000 for WB;  
 VINCULIN, CST, catalog number 4650s, lot number 2, dilution 1: 2000 for WB;  
 GAPDH, Santa Cruz, catalog number sc-25778, dilution 1:2000 for WB;  
 HRAS, Santa Cruz, catalog number sc-520, dilution 1:1000 for WB;  
 Histone 3, Active Motif, catalog number 39163, dilution 1:3000 for WB,

Secondary antibodies:  
 Goat anti-mouse IgG Alexa Fluor 594, Molecular Probes, catalog number A-11032, dilution 1:250 for IF;  
 Goat anti-mouse IgG HRP, Santa Cruz, catalog number sc-2005, lot number B2213, dilution 1:2000 for WB;  
 Goat anti-rabbit IgG HRP, Santa Cruz, catalog number sc-2004, lot number B2216, dilution 1:2000 for WB

ChIP-seq antibodies:  
 CASZ1, home made by collaborating with Rockland Inc, affinity purified, named as Cas-ab8540  
 H3K27ac, Abcam, catalog number ab4729, lot number GR232896-1;  
 H3K27me3, EMD Millipore, catalog number 07-449, lot number 3083046;  
 H3K4me3, CST, catalog number 9751, lot number 10;  
 RNA polymerase II, Active Motif, catalog number 39097, lot number 30617017;  
 Ty1, Diagenode, catalog number C15200054, lot number 006

### Validation

Commercially available antibodies used have been validated by their respective manufactures' catalogue files to be compatible. Antibodies for ChIP-Seq including histone marks, RNA Pol II and Ty1 have been validated for ChIP assays by the manufactures and have been used for ChIP-seq by researchers in many publications.

Specificity of antibody against CASZ1 was confirmed by peptide competition (Liu et al., Plos One 2011), transient siRNA against CASZ1 protein, followed by western blotting. To validate CASZ1 antibody for ChIP-seq, we performed immunoprecipitation of formaldehyde cross-linked cells that with low or high CASZ1 expression, followed by western blotting. We also compared the ChIP-seq results of CASZ1b-3xTy1 fusion protein transfected cells using anti-CASZ1 antibody and anti-Ty1 antibody and demonstrated the results are significantly correlated (pearson's correlation=0.89).

## Eukaryotic cell lines

Policy information about [cell lines](#)

|                                                                   |                                                                                                                                                                                                                                        |
|-------------------------------------------------------------------|----------------------------------------------------------------------------------------------------------------------------------------------------------------------------------------------------------------------------------------|
| Cell line source(s)                                               | C2C12 and HEK293T cell lines were obtained from ATCC. Rhabdomyosarcoma RD and SMS-CTR cell lines were originally obtained from ATCC, and RH30 was originally obtained from Peter Houghton's lab, where this cell line was established. |
| Authentication                                                    | All cell lines used were STR tested for identity by Cancer Genomics Research Laboratory (CGR) at NCI.                                                                                                                                  |
| Mycoplasma contamination                                          | All cells were routinely tested for mycoplasma and confirmed negative.                                                                                                                                                                 |
| Commonly misidentified lines (See <a href="#">ICLAC</a> register) | No commonly misidentified cell lines were used in this study.                                                                                                                                                                          |

## Animals and other organisms

Policy information about [studies involving animals](#); [ARRIVE guidelines](#) recommended for reporting animal research

|                         |                                                                                                                                                                                                                                                                                                                                                                                                                                                                                                                                              |
|-------------------------|----------------------------------------------------------------------------------------------------------------------------------------------------------------------------------------------------------------------------------------------------------------------------------------------------------------------------------------------------------------------------------------------------------------------------------------------------------------------------------------------------------------------------------------------|
| Laboratory animals      | Groups of 4 to 6 weeks old female Fox Chase SCID Beige: CB17.B6-PrkdcscidLyst bg/Crl (SCID Beige) mice were injected with $2 \times 10^6$ in 100 $\mu$ l cell suspension mixed with matrigel (1:1) into the left hind limb at the gastrocnemius muscle. In all experiments, the leg dimensions were measured twice a week with digital calipers to obtain two diameters of the tumor diameter, from which the tumor volume was determined. All mice were euthanized when any of the tumor diameters were approaching 20 mm in any dimension. |
| Wild animals            | No wild animals were used in this study.                                                                                                                                                                                                                                                                                                                                                                                                                                                                                                     |
| Field-collected samples | No field-collected samples were used in this study.                                                                                                                                                                                                                                                                                                                                                                                                                                                                                          |
| Ethics oversight        | All Xenograft studies were approved by the National Cancer Institute's Animal Care and Use Committee (ACUC), and all animal care was in accordance with institutional guidelines.                                                                                                                                                                                                                                                                                                                                                            |

Note that full information on the approval of the study protocol must also be provided in the manuscript.

## ChIP-seq

### Data deposition

- Confirm that both raw and final processed data have been deposited in a public database such as [GEO](#).
- Confirm that you have deposited or provided access to graph files (e.g. BED files) for the called peaks.

|                                                                    |                                                                                                                                                                                                                                                               |
|--------------------------------------------------------------------|---------------------------------------------------------------------------------------------------------------------------------------------------------------------------------------------------------------------------------------------------------------|
| Data access links<br><i>May remain private before publication.</i> | GEO accession number for data generated in this study is GSE126147.<br>Link:<br><a href="https://www.ncbi.nlm.nih.gov/geo/query/acc.cgi?acc=GSE126147">https://www.ncbi.nlm.nih.gov/geo/query/acc.cgi?acc=GSE126147</a> .<br>Accession key:<br>abahoaowhtcfix |
|--------------------------------------------------------------------|---------------------------------------------------------------------------------------------------------------------------------------------------------------------------------------------------------------------------------------------------------------|

| Files in database submission | <table> <thead> <tr> <th>GSM number</th> <th>processed data file</th> <th>raw file</th> </tr> </thead> <tbody> <tr><td>GSM3592269</td><td>CTRtetCASZ1b_Ty1_Ctrl.bw</td><td>CTRtetCASZ1b_Ty1_Ctrl.fastq.gz</td></tr> <tr><td>GSM3592270</td><td>CTRtetCASZ1b_Ty1_Dox.bw</td><td>CTRtetCASZ1b_Ty1_Dox.fastq.gz</td></tr> <tr><td>GSM3592271</td><td>CTRtetCASZ1b_CASZ1_Ctrl.bw</td><td>CTRtetCASZ1b_CASZ1_Ctrl.fastq.gz</td></tr> <tr><td>GSM3592272</td><td>CTRtetCASZ1b_CASZ1_Dox.bw</td><td>CTRtetCASZ1b_CASZ1_Dox.fastq.gz</td></tr> <tr><td>GSM3592273</td><td>CTRtetCASZ1b_H3K27Ac_Ctrl.bw</td><td>CTRtetCASZ1b_H3K27Ac_Ctrl.fastq.gz</td></tr> <tr><td>GSM3592274</td><td>CTRtetCASZ1b_H3K27Ac_Dox.bw</td><td>CTRtetCASZ1b_H3K27Ac_Dox.fastq.gz</td></tr> <tr><td>GSM3592275</td><td>CTRtetCASZ1b_H3K27me3_Ctrl.bw</td><td>CTRtetCASZ1b_H3K27me3_Ctrl.fastq.gz</td></tr> <tr><td>GSM3592276</td><td>CTRtetCASZ1b_H3K27me3_Dox.bw</td><td>CTRtetCASZ1b_H3K27me3_Dox.fastq.gz</td></tr> <tr><td>GSM3592277</td><td>CTRtetCASZ1b_H3K4me3_Ctrl.bw</td><td>CTRtetCASZ1b_H3K4me3_Ctrl.fastq.gz</td></tr> <tr><td>GSM3592278</td><td>CTRtetCASZ1b_H3K4me3_Dox.bw</td><td>CTRtetCASZ1b_H3K4me3_Dox.fastq.gz</td></tr> <tr><td>GSM3592279</td><td>CTRtetCASZ1b_RNA_PolII_Ctrl.bw</td><td>CTRtetCASZ1b_RNA_PolII_Ctrl.fastq.gz</td></tr> <tr><td>GSM3592280</td><td>CTRtetCASZ1b_RNA_PolII_Dox.bw</td><td>CTRtetCASZ1b_RNA_PolII_Dox.fastq.gz</td></tr> <tr><td>GSM3592281</td><td>CTRtetCASZ1b_Input_Ctrl.bw</td><td>CTRtetCASZ1b_Input_Ctrl.fastq.gz</td></tr> <tr><td>GSM3592282</td><td>CTRtetCASZ1b_Input_Dox.bw</td><td>CTRtetCASZ1b_Input_Dox.fastq.gz</td></tr> <tr><td>GSM3592283</td><td>SMS-CTR_DMSO_CASZ1.bw</td><td>SMS-CTR_DMSO_CASZ1.fastq.gz</td></tr> <tr><td>GSM3592284</td><td>SMS-CTR_Tremetinib_CASZ1.bw</td><td>SMS-CTR_Tremetinib_CASZ1.fastq.gz</td></tr> <tr><td>GSM3592285</td><td>SMS-CTR_DMSO_Input.bw</td><td>SMS-CTR_DMSO_Input.fastq.gz</td></tr> <tr><td>GSM3592286</td><td>SMS-CTR_Tremetinib_Input.bw</td><td>SMS-CTR_Tremetinib_Input.fastq.gz</td></tr> </tbody> </table> | GSM number                           | processed data file | raw file | GSM3592269 | CTRtetCASZ1b_Ty1_Ctrl.bw | CTRtetCASZ1b_Ty1_Ctrl.fastq.gz | GSM3592270 | CTRtetCASZ1b_Ty1_Dox.bw | CTRtetCASZ1b_Ty1_Dox.fastq.gz | GSM3592271 | CTRtetCASZ1b_CASZ1_Ctrl.bw | CTRtetCASZ1b_CASZ1_Ctrl.fastq.gz | GSM3592272 | CTRtetCASZ1b_CASZ1_Dox.bw | CTRtetCASZ1b_CASZ1_Dox.fastq.gz | GSM3592273 | CTRtetCASZ1b_H3K27Ac_Ctrl.bw | CTRtetCASZ1b_H3K27Ac_Ctrl.fastq.gz | GSM3592274 | CTRtetCASZ1b_H3K27Ac_Dox.bw | CTRtetCASZ1b_H3K27Ac_Dox.fastq.gz | GSM3592275 | CTRtetCASZ1b_H3K27me3_Ctrl.bw | CTRtetCASZ1b_H3K27me3_Ctrl.fastq.gz | GSM3592276 | CTRtetCASZ1b_H3K27me3_Dox.bw | CTRtetCASZ1b_H3K27me3_Dox.fastq.gz | GSM3592277 | CTRtetCASZ1b_H3K4me3_Ctrl.bw | CTRtetCASZ1b_H3K4me3_Ctrl.fastq.gz | GSM3592278 | CTRtetCASZ1b_H3K4me3_Dox.bw | CTRtetCASZ1b_H3K4me3_Dox.fastq.gz | GSM3592279 | CTRtetCASZ1b_RNA_PolII_Ctrl.bw | CTRtetCASZ1b_RNA_PolII_Ctrl.fastq.gz | GSM3592280 | CTRtetCASZ1b_RNA_PolII_Dox.bw | CTRtetCASZ1b_RNA_PolII_Dox.fastq.gz | GSM3592281 | CTRtetCASZ1b_Input_Ctrl.bw | CTRtetCASZ1b_Input_Ctrl.fastq.gz | GSM3592282 | CTRtetCASZ1b_Input_Dox.bw | CTRtetCASZ1b_Input_Dox.fastq.gz | GSM3592283 | SMS-CTR_DMSO_CASZ1.bw | SMS-CTR_DMSO_CASZ1.fastq.gz | GSM3592284 | SMS-CTR_Tremetinib_CASZ1.bw | SMS-CTR_Tremetinib_CASZ1.fastq.gz | GSM3592285 | SMS-CTR_DMSO_Input.bw | SMS-CTR_DMSO_Input.fastq.gz | GSM3592286 | SMS-CTR_Tremetinib_Input.bw | SMS-CTR_Tremetinib_Input.fastq.gz |
|------------------------------|----------------------------------------------------------------------------------------------------------------------------------------------------------------------------------------------------------------------------------------------------------------------------------------------------------------------------------------------------------------------------------------------------------------------------------------------------------------------------------------------------------------------------------------------------------------------------------------------------------------------------------------------------------------------------------------------------------------------------------------------------------------------------------------------------------------------------------------------------------------------------------------------------------------------------------------------------------------------------------------------------------------------------------------------------------------------------------------------------------------------------------------------------------------------------------------------------------------------------------------------------------------------------------------------------------------------------------------------------------------------------------------------------------------------------------------------------------------------------------------------------------------------------------------------------------------------------------------------------------------------------------------------------------------------------------------------------------------------------------------------------------------------------------------------------------------------------------------------------------------------------------------------------------------------------------------------------------------------------------------------------------------------------------------------------------------------------------------------------------|--------------------------------------|---------------------|----------|------------|--------------------------|--------------------------------|------------|-------------------------|-------------------------------|------------|----------------------------|----------------------------------|------------|---------------------------|---------------------------------|------------|------------------------------|------------------------------------|------------|-----------------------------|-----------------------------------|------------|-------------------------------|-------------------------------------|------------|------------------------------|------------------------------------|------------|------------------------------|------------------------------------|------------|-----------------------------|-----------------------------------|------------|--------------------------------|--------------------------------------|------------|-------------------------------|-------------------------------------|------------|----------------------------|----------------------------------|------------|---------------------------|---------------------------------|------------|-----------------------|-----------------------------|------------|-----------------------------|-----------------------------------|------------|-----------------------|-----------------------------|------------|-----------------------------|-----------------------------------|
| GSM number                   | processed data file                                                                                                                                                                                                                                                                                                                                                                                                                                                                                                                                                                                                                                                                                                                                                                                                                                                                                                                                                                                                                                                                                                                                                                                                                                                                                                                                                                                                                                                                                                                                                                                                                                                                                                                                                                                                                                                                                                                                                                                                                                                                                      | raw file                             |                     |          |            |                          |                                |            |                         |                               |            |                            |                                  |            |                           |                                 |            |                              |                                    |            |                             |                                   |            |                               |                                     |            |                              |                                    |            |                              |                                    |            |                             |                                   |            |                                |                                      |            |                               |                                     |            |                            |                                  |            |                           |                                 |            |                       |                             |            |                             |                                   |            |                       |                             |            |                             |                                   |
| GSM3592269                   | CTRtetCASZ1b_Ty1_Ctrl.bw                                                                                                                                                                                                                                                                                                                                                                                                                                                                                                                                                                                                                                                                                                                                                                                                                                                                                                                                                                                                                                                                                                                                                                                                                                                                                                                                                                                                                                                                                                                                                                                                                                                                                                                                                                                                                                                                                                                                                                                                                                                                                 | CTRtetCASZ1b_Ty1_Ctrl.fastq.gz       |                     |          |            |                          |                                |            |                         |                               |            |                            |                                  |            |                           |                                 |            |                              |                                    |            |                             |                                   |            |                               |                                     |            |                              |                                    |            |                              |                                    |            |                             |                                   |            |                                |                                      |            |                               |                                     |            |                            |                                  |            |                           |                                 |            |                       |                             |            |                             |                                   |            |                       |                             |            |                             |                                   |
| GSM3592270                   | CTRtetCASZ1b_Ty1_Dox.bw                                                                                                                                                                                                                                                                                                                                                                                                                                                                                                                                                                                                                                                                                                                                                                                                                                                                                                                                                                                                                                                                                                                                                                                                                                                                                                                                                                                                                                                                                                                                                                                                                                                                                                                                                                                                                                                                                                                                                                                                                                                                                  | CTRtetCASZ1b_Ty1_Dox.fastq.gz        |                     |          |            |                          |                                |            |                         |                               |            |                            |                                  |            |                           |                                 |            |                              |                                    |            |                             |                                   |            |                               |                                     |            |                              |                                    |            |                              |                                    |            |                             |                                   |            |                                |                                      |            |                               |                                     |            |                            |                                  |            |                           |                                 |            |                       |                             |            |                             |                                   |            |                       |                             |            |                             |                                   |
| GSM3592271                   | CTRtetCASZ1b_CASZ1_Ctrl.bw                                                                                                                                                                                                                                                                                                                                                                                                                                                                                                                                                                                                                                                                                                                                                                                                                                                                                                                                                                                                                                                                                                                                                                                                                                                                                                                                                                                                                                                                                                                                                                                                                                                                                                                                                                                                                                                                                                                                                                                                                                                                               | CTRtetCASZ1b_CASZ1_Ctrl.fastq.gz     |                     |          |            |                          |                                |            |                         |                               |            |                            |                                  |            |                           |                                 |            |                              |                                    |            |                             |                                   |            |                               |                                     |            |                              |                                    |            |                              |                                    |            |                             |                                   |            |                                |                                      |            |                               |                                     |            |                            |                                  |            |                           |                                 |            |                       |                             |            |                             |                                   |            |                       |                             |            |                             |                                   |
| GSM3592272                   | CTRtetCASZ1b_CASZ1_Dox.bw                                                                                                                                                                                                                                                                                                                                                                                                                                                                                                                                                                                                                                                                                                                                                                                                                                                                                                                                                                                                                                                                                                                                                                                                                                                                                                                                                                                                                                                                                                                                                                                                                                                                                                                                                                                                                                                                                                                                                                                                                                                                                | CTRtetCASZ1b_CASZ1_Dox.fastq.gz      |                     |          |            |                          |                                |            |                         |                               |            |                            |                                  |            |                           |                                 |            |                              |                                    |            |                             |                                   |            |                               |                                     |            |                              |                                    |            |                              |                                    |            |                             |                                   |            |                                |                                      |            |                               |                                     |            |                            |                                  |            |                           |                                 |            |                       |                             |            |                             |                                   |            |                       |                             |            |                             |                                   |
| GSM3592273                   | CTRtetCASZ1b_H3K27Ac_Ctrl.bw                                                                                                                                                                                                                                                                                                                                                                                                                                                                                                                                                                                                                                                                                                                                                                                                                                                                                                                                                                                                                                                                                                                                                                                                                                                                                                                                                                                                                                                                                                                                                                                                                                                                                                                                                                                                                                                                                                                                                                                                                                                                             | CTRtetCASZ1b_H3K27Ac_Ctrl.fastq.gz   |                     |          |            |                          |                                |            |                         |                               |            |                            |                                  |            |                           |                                 |            |                              |                                    |            |                             |                                   |            |                               |                                     |            |                              |                                    |            |                              |                                    |            |                             |                                   |            |                                |                                      |            |                               |                                     |            |                            |                                  |            |                           |                                 |            |                       |                             |            |                             |                                   |            |                       |                             |            |                             |                                   |
| GSM3592274                   | CTRtetCASZ1b_H3K27Ac_Dox.bw                                                                                                                                                                                                                                                                                                                                                                                                                                                                                                                                                                                                                                                                                                                                                                                                                                                                                                                                                                                                                                                                                                                                                                                                                                                                                                                                                                                                                                                                                                                                                                                                                                                                                                                                                                                                                                                                                                                                                                                                                                                                              | CTRtetCASZ1b_H3K27Ac_Dox.fastq.gz    |                     |          |            |                          |                                |            |                         |                               |            |                            |                                  |            |                           |                                 |            |                              |                                    |            |                             |                                   |            |                               |                                     |            |                              |                                    |            |                              |                                    |            |                             |                                   |            |                                |                                      |            |                               |                                     |            |                            |                                  |            |                           |                                 |            |                       |                             |            |                             |                                   |            |                       |                             |            |                             |                                   |
| GSM3592275                   | CTRtetCASZ1b_H3K27me3_Ctrl.bw                                                                                                                                                                                                                                                                                                                                                                                                                                                                                                                                                                                                                                                                                                                                                                                                                                                                                                                                                                                                                                                                                                                                                                                                                                                                                                                                                                                                                                                                                                                                                                                                                                                                                                                                                                                                                                                                                                                                                                                                                                                                            | CTRtetCASZ1b_H3K27me3_Ctrl.fastq.gz  |                     |          |            |                          |                                |            |                         |                               |            |                            |                                  |            |                           |                                 |            |                              |                                    |            |                             |                                   |            |                               |                                     |            |                              |                                    |            |                              |                                    |            |                             |                                   |            |                                |                                      |            |                               |                                     |            |                            |                                  |            |                           |                                 |            |                       |                             |            |                             |                                   |            |                       |                             |            |                             |                                   |
| GSM3592276                   | CTRtetCASZ1b_H3K27me3_Dox.bw                                                                                                                                                                                                                                                                                                                                                                                                                                                                                                                                                                                                                                                                                                                                                                                                                                                                                                                                                                                                                                                                                                                                                                                                                                                                                                                                                                                                                                                                                                                                                                                                                                                                                                                                                                                                                                                                                                                                                                                                                                                                             | CTRtetCASZ1b_H3K27me3_Dox.fastq.gz   |                     |          |            |                          |                                |            |                         |                               |            |                            |                                  |            |                           |                                 |            |                              |                                    |            |                             |                                   |            |                               |                                     |            |                              |                                    |            |                              |                                    |            |                             |                                   |            |                                |                                      |            |                               |                                     |            |                            |                                  |            |                           |                                 |            |                       |                             |            |                             |                                   |            |                       |                             |            |                             |                                   |
| GSM3592277                   | CTRtetCASZ1b_H3K4me3_Ctrl.bw                                                                                                                                                                                                                                                                                                                                                                                                                                                                                                                                                                                                                                                                                                                                                                                                                                                                                                                                                                                                                                                                                                                                                                                                                                                                                                                                                                                                                                                                                                                                                                                                                                                                                                                                                                                                                                                                                                                                                                                                                                                                             | CTRtetCASZ1b_H3K4me3_Ctrl.fastq.gz   |                     |          |            |                          |                                |            |                         |                               |            |                            |                                  |            |                           |                                 |            |                              |                                    |            |                             |                                   |            |                               |                                     |            |                              |                                    |            |                              |                                    |            |                             |                                   |            |                                |                                      |            |                               |                                     |            |                            |                                  |            |                           |                                 |            |                       |                             |            |                             |                                   |            |                       |                             |            |                             |                                   |
| GSM3592278                   | CTRtetCASZ1b_H3K4me3_Dox.bw                                                                                                                                                                                                                                                                                                                                                                                                                                                                                                                                                                                                                                                                                                                                                                                                                                                                                                                                                                                                                                                                                                                                                                                                                                                                                                                                                                                                                                                                                                                                                                                                                                                                                                                                                                                                                                                                                                                                                                                                                                                                              | CTRtetCASZ1b_H3K4me3_Dox.fastq.gz    |                     |          |            |                          |                                |            |                         |                               |            |                            |                                  |            |                           |                                 |            |                              |                                    |            |                             |                                   |            |                               |                                     |            |                              |                                    |            |                              |                                    |            |                             |                                   |            |                                |                                      |            |                               |                                     |            |                            |                                  |            |                           |                                 |            |                       |                             |            |                             |                                   |            |                       |                             |            |                             |                                   |
| GSM3592279                   | CTRtetCASZ1b_RNA_PolII_Ctrl.bw                                                                                                                                                                                                                                                                                                                                                                                                                                                                                                                                                                                                                                                                                                                                                                                                                                                                                                                                                                                                                                                                                                                                                                                                                                                                                                                                                                                                                                                                                                                                                                                                                                                                                                                                                                                                                                                                                                                                                                                                                                                                           | CTRtetCASZ1b_RNA_PolII_Ctrl.fastq.gz |                     |          |            |                          |                                |            |                         |                               |            |                            |                                  |            |                           |                                 |            |                              |                                    |            |                             |                                   |            |                               |                                     |            |                              |                                    |            |                              |                                    |            |                             |                                   |            |                                |                                      |            |                               |                                     |            |                            |                                  |            |                           |                                 |            |                       |                             |            |                             |                                   |            |                       |                             |            |                             |                                   |
| GSM3592280                   | CTRtetCASZ1b_RNA_PolII_Dox.bw                                                                                                                                                                                                                                                                                                                                                                                                                                                                                                                                                                                                                                                                                                                                                                                                                                                                                                                                                                                                                                                                                                                                                                                                                                                                                                                                                                                                                                                                                                                                                                                                                                                                                                                                                                                                                                                                                                                                                                                                                                                                            | CTRtetCASZ1b_RNA_PolII_Dox.fastq.gz  |                     |          |            |                          |                                |            |                         |                               |            |                            |                                  |            |                           |                                 |            |                              |                                    |            |                             |                                   |            |                               |                                     |            |                              |                                    |            |                              |                                    |            |                             |                                   |            |                                |                                      |            |                               |                                     |            |                            |                                  |            |                           |                                 |            |                       |                             |            |                             |                                   |            |                       |                             |            |                             |                                   |
| GSM3592281                   | CTRtetCASZ1b_Input_Ctrl.bw                                                                                                                                                                                                                                                                                                                                                                                                                                                                                                                                                                                                                                                                                                                                                                                                                                                                                                                                                                                                                                                                                                                                                                                                                                                                                                                                                                                                                                                                                                                                                                                                                                                                                                                                                                                                                                                                                                                                                                                                                                                                               | CTRtetCASZ1b_Input_Ctrl.fastq.gz     |                     |          |            |                          |                                |            |                         |                               |            |                            |                                  |            |                           |                                 |            |                              |                                    |            |                             |                                   |            |                               |                                     |            |                              |                                    |            |                              |                                    |            |                             |                                   |            |                                |                                      |            |                               |                                     |            |                            |                                  |            |                           |                                 |            |                       |                             |            |                             |                                   |            |                       |                             |            |                             |                                   |
| GSM3592282                   | CTRtetCASZ1b_Input_Dox.bw                                                                                                                                                                                                                                                                                                                                                                                                                                                                                                                                                                                                                                                                                                                                                                                                                                                                                                                                                                                                                                                                                                                                                                                                                                                                                                                                                                                                                                                                                                                                                                                                                                                                                                                                                                                                                                                                                                                                                                                                                                                                                | CTRtetCASZ1b_Input_Dox.fastq.gz      |                     |          |            |                          |                                |            |                         |                               |            |                            |                                  |            |                           |                                 |            |                              |                                    |            |                             |                                   |            |                               |                                     |            |                              |                                    |            |                              |                                    |            |                             |                                   |            |                                |                                      |            |                               |                                     |            |                            |                                  |            |                           |                                 |            |                       |                             |            |                             |                                   |            |                       |                             |            |                             |                                   |
| GSM3592283                   | SMS-CTR_DMSO_CASZ1.bw                                                                                                                                                                                                                                                                                                                                                                                                                                                                                                                                                                                                                                                                                                                                                                                                                                                                                                                                                                                                                                                                                                                                                                                                                                                                                                                                                                                                                                                                                                                                                                                                                                                                                                                                                                                                                                                                                                                                                                                                                                                                                    | SMS-CTR_DMSO_CASZ1.fastq.gz          |                     |          |            |                          |                                |            |                         |                               |            |                            |                                  |            |                           |                                 |            |                              |                                    |            |                             |                                   |            |                               |                                     |            |                              |                                    |            |                              |                                    |            |                             |                                   |            |                                |                                      |            |                               |                                     |            |                            |                                  |            |                           |                                 |            |                       |                             |            |                             |                                   |            |                       |                             |            |                             |                                   |
| GSM3592284                   | SMS-CTR_Tremetinib_CASZ1.bw                                                                                                                                                                                                                                                                                                                                                                                                                                                                                                                                                                                                                                                                                                                                                                                                                                                                                                                                                                                                                                                                                                                                                                                                                                                                                                                                                                                                                                                                                                                                                                                                                                                                                                                                                                                                                                                                                                                                                                                                                                                                              | SMS-CTR_Tremetinib_CASZ1.fastq.gz    |                     |          |            |                          |                                |            |                         |                               |            |                            |                                  |            |                           |                                 |            |                              |                                    |            |                             |                                   |            |                               |                                     |            |                              |                                    |            |                              |                                    |            |                             |                                   |            |                                |                                      |            |                               |                                     |            |                            |                                  |            |                           |                                 |            |                       |                             |            |                             |                                   |            |                       |                             |            |                             |                                   |
| GSM3592285                   | SMS-CTR_DMSO_Input.bw                                                                                                                                                                                                                                                                                                                                                                                                                                                                                                                                                                                                                                                                                                                                                                                                                                                                                                                                                                                                                                                                                                                                                                                                                                                                                                                                                                                                                                                                                                                                                                                                                                                                                                                                                                                                                                                                                                                                                                                                                                                                                    | SMS-CTR_DMSO_Input.fastq.gz          |                     |          |            |                          |                                |            |                         |                               |            |                            |                                  |            |                           |                                 |            |                              |                                    |            |                             |                                   |            |                               |                                     |            |                              |                                    |            |                              |                                    |            |                             |                                   |            |                                |                                      |            |                               |                                     |            |                            |                                  |            |                           |                                 |            |                       |                             |            |                             |                                   |            |                       |                             |            |                             |                                   |
| GSM3592286                   | SMS-CTR_Tremetinib_Input.bw                                                                                                                                                                                                                                                                                                                                                                                                                                                                                                                                                                                                                                                                                                                                                                                                                                                                                                                                                                                                                                                                                                                                                                                                                                                                                                                                                                                                                                                                                                                                                                                                                                                                                                                                                                                                                                                                                                                                                                                                                                                                              | SMS-CTR_Tremetinib_Input.fastq.gz    |                     |          |            |                          |                                |            |                         |                               |            |                            |                                  |            |                           |                                 |            |                              |                                    |            |                             |                                   |            |                               |                                     |            |                              |                                    |            |                              |                                    |            |                             |                                   |            |                                |                                      |            |                               |                                     |            |                            |                                  |            |                           |                                 |            |                       |                             |            |                             |                                   |            |                       |                             |            |                             |                                   |

|            |                            |                                  |
|------------|----------------------------|----------------------------------|
| GSM3592263 | C2C12_H3K27Ac_DM_shCtrl.bw | C2C12_H3K27Ac_DM_shCtrl.fastq.gz |
| GSM3592264 | C2C12_H3K27Ac_DM_shCas.bw  | C2C12_H3K27Ac_DM_shCas.fastq.gz  |
| GSM3592265 | C2C12_H3K4me3_DM_shCtrl.bw | C2C12_H3K4me3_DM_shCtrl.fastq.gz |
| GSM3592266 | C2C12_H3K4me3_DM_shCas.bw  | C2C12_H3K4me3_DM_shCas.fastq.gz  |
| GSM3592267 | C2C12_Input_shCtrl.bw      | C2C12_Input_shCtrl.fastq.gz      |
| GSM3592268 | C2C12_Input_shCas.bw       | C2C12_Input_shCas.fastq.gz       |

Genome browser session  
(e.g. [UCSC](#))

N/A

## Methodology

Replicates

For each experiment, 4-5 individual 15 cm dishes of control or treatment group of C2C12 cells or SMS-CTR cells were fixed and cell pellet were collected from each dish. 4-5 pellets were sonicated per group and sonicated nuclear extracts were pooled, mixed well and aliquoted. 20 - 50 µg sonicated chromatin was used for each ChIP.

Sequencing depth

ChIP-sequencing was performed using Illumina NextSeq single end 75bp reads.

| Sample                         | Total Reads | Mapped Reads |
|--------------------------------|-------------|--------------|
| SMS-CTRtetCASZ1_Ctrl_Input     | 36270757    | 35169739     |
| SMS-CTRtetCASZ1_Dox_Input      | 40735455    | 39728585     |
| SMS-CTRtetCASZ1_Ctrl_Ty1       | 41313225    | 37920917     |
| SMS-CTRtetCASZ1_Dox_Ty1        | 35087452    | 33578246     |
| SMS-CTRtetCASZ1_Ctrl_CASZ1     | 29847886    | 28892571     |
| SMS-CTRtetCASZ1_Dox_CASZ1      | 33636741    | 32784786     |
| SMS-CTRtetCASZ1_Ctrl_H3K27ac   | 30787681    | 30240045     |
| SMS-CTRtetCASZ1_Dox_H3K27ac    | 38905126    | 38237253     |
| SMS-CTRtetCASZ1_Ctrl_H3K27me3  | 31220731    | 28829049     |
| SMS-CTRtetCASZ1_Dox_H3K27me3   | 28252454    | 26054645     |
| SMS-CTRtetCASZ1_Ctrl_H3K4me3   | 39599825    | 38703301     |
| SMS-CTRtetCASZ1_Dox_H3K4me3    | 39441714    | 38572536     |
| SMS-CTRtetCASZ1_Ctrl_RNAPolIII | 38712772    | 37183917     |
| SMS-CTRtetCASZ1_Dox_RNAPolIII  | 41073978    | 39653442     |
| SMS-CTR_Ctrl_Input             | 25030512    | 24303312     |
| SMS-CTR_MEKi_Input             | 30289586    | 29290378     |
| SMS-CTR_Ctrl_CASZ1             | 40942329    | 39574184     |
| SMS-CTR_MEKi_CASZ1             | 45102854    | 43171454     |
| C2C12_shCtrl_Input             | 30749936    | 29392134     |
| C2C12_shCasz1_Input            | 30332148    | 28928788     |
| C2C12_shCtrl_DM_H3K27ac        | 33885353    | 32762909     |
| C2C12_shCasz1_DM_H3K27ac       | 36839736    | 35618082     |
| C2C12_shCtrl_DM_H3K4me3        | 30315213    | 29141707     |
| C2C12_shCasz1_DM_H3K4me3       | 31078266    | 29910441     |

Antibodies

CASZ1, home made by collaborating with Rockland Inc, affinity purified, named as Cas-ab8540  
H3K27ac, Abcam, catalog number ab4729, lot number GR232896-1;  
H3K27me3, EMD Millipore, catalog number 07-449, lot number 3083046;  
H3K4me3, CST, catalog number 9751, lot number 10;  
RNA polymerase II, Active Motif, catalog number 39097, lot number 30617017;  
Ty1, Diagenode, catalog number C15200054, lot number 006

Peak calling parameters

Regions enriched in ChIP-seq signal were identified using MACS with corresponding control and parameters -f BAM -g mm -B -p 1e-7 -m 5 50 for narrowPeak calling and -f BAM --broad -g mm --broad-cutoff 0.1 -B -p 1e-7 -m 5 50 for broadPeak calling.

Data quality

Data quality was assessed using MACS by comparing peak enrichment over input controls with a p cutoff value of  $1 \times 10^{-5}$  or  $1 \times 10^{-7}$ .

Software

Reads were aligned to the human genome (hg19) or mouse genome (mm10) using bwa mem with parameters -M -t 32. For visualization, tdf files were created from aligned ChIP-Seq read positions using igvtools count and to TDF with default parameters. Heatmaps of ChIP-Seq signal in these regions were made by using deeptools computeMatrix reference-point and plotHeatmap with default parameter ([https://deeptools.readthedocs.io/en/develop/content/list\\_of\\_tools.html](https://deeptools.readthedocs.io/en/develop/content/list_of_tools.html)). Super-enhancers in were identified using ROSE ([https://bitbucket.org/young\\_computation/rose](https://bitbucket.org/young_computation/rose)) with default parameter.
